# Supplementary material for: Glyphosate and AMPA in Human Urine of HBM4EU-Aligned Studies: Part B Adults
Source: MDPI journal article supplement (doi:10.3390/toxics10100552), 2022-09-21
Supplement: s1 [file s1]

## Supplementary data

**Table S1.** Logistic binary regression for urinary concentrations of glyphosate (Gly) by some potential exposure determinants, subgroups of the participants stratified for individual characteristics, dietary preferences, exposure relevant behavior and sociodemographic information.

| Determinant                     |                                              | UBA ESB (Germany) |      |              | Swiss HBM4EU study (Switzerland) |       |              | DIET-HBM (Iceland) |       |              | ESTEBAN (France) |       |              | Combined data* |       |              |
|---------------------------------|----------------------------------------------|-------------------|------|--------------|----------------------------------|-------|--------------|--------------------|-------|--------------|------------------|-------|--------------|----------------|-------|--------------|
|                                 |                                              | N                 | Beta | p value      | N                                | Beta  | p value      | N                  | Beta  | p value      | N                | Beta  | p value      | N              | Beta  | p value      |
| Sex                             | Female                                       | 125               | 0    |              | 137                              |       |              | 107                | 0     |              | 94               |       |              | 463            | 0     |              |
|                                 | Male                                         | 124               | 0.88 | <b>0.009</b> | 162                              | -0.37 | 0.275        | 88                 | -0.29 | 0.408        | 74               | -0.11 | 0.795        | 448            | 0.06  | 0.714        |
| Age in years                    |                                              | 249               | 0.06 | 0.421        | 299                              | -0.06 | <b>0.060</b> | 195                | 0.05  | <b>0.090</b> | 168              | -0.06 | <b>0.159</b> | 911            | -0.01 | 0.583        |
| Nuts 1                          |                                              | All same category |      |              | All same category                |       |              | All same category  |       |              | 168              |       | 0.788        | 911            |       | 0.002        |
| Nuts 2                          |                                              | All same category |      |              | All same category                |       |              | All same category  |       |              | 168              |       | 0.993        | 911            |       | 0.096        |
| Nuts 3                          |                                              | All same category |      |              | 299                              |       | 1            | 195                |       | 0.362        | 168              |       | 1            | 911            |       | 1            |
| DEGURBA                         | Densely populated area (cities)              | All same category |      |              | 273                              | 0     |              | 146                | 0     |              | 76               | 0     |              | 744            | 0     |              |
|                                 | Intermediate density area (towns or suburbs) |                   |      |              | 26                               | 0.09  | 0.868        | 22                 | -0.28 | 0.622        | 47               | -0.42 | 0.426        | 95             | 0.02  | 0.946        |
|                                 | Thinly populated area (rural area)           |                   |      |              |                                  |       |              | 23                 | 0.21  | 0.674        | 45               | -0.02 | 0.959        | 68             | 0.21  | 0.564        |
| Sampling season                 | Spring                                       | All same category |      |              | 147                              | 0     |              |                    |       |              | 36               | 0     |              | 432            | 0     |              |
|                                 | Summer                                       |                   |      |              |                                  |       |              | 65                 | 0     |              | 38               | -1.11 | <b>0.067</b> | 189            | -0.62 | 0.048        |
|                                 | Fall                                         |                   |      |              | 86                               | -0.14 | 0.716        | 104                | 0.11  | 0.767        | 61               | -0.82 | <b>0.100</b> | 165            | -0.42 | 0.255        |
|                                 | Winter                                       |                   |      |              | 66                               | 0.37  | 0.314        | 26                 | 0.40  | 0.454        | 33               | -1.95 | <b>0.017</b> | 125            | -0.24 | 0.437        |
| Use of pesticide outdoor        | No                                           |                   |      |              | 68                               | 0     |              |                    |       |              | 63               | 0     |              | 131            | 0     |              |
|                                 | Yes                                          |                   |      |              | 42                               | -0.06 | 0.918        |                    |       |              | 23               | 0.81  | 0.211        | 65             | 0.29  | 0.513        |
| Use of pesticides in the house  | No                                           |                   |      |              | 180                              | 0     |              |                    |       |              | 69               | 0     |              | 249            | 0     |              |
|                                 | Yes                                          |                   |      |              | 79                               | 0.46  | <b>0.194</b> |                    |       |              | 97               | 0.14  | 0.753        | 176            | 0.46  | <b>0.110</b> |
| Frequency consumption of eggs** | 0 = Never                                    | 3                 | 0    |              |                                  |       |              |                    |       |              | 3                | 0     |              | 6              | 0     |              |

| Determinant                                        |                                                                     | UBA ESB (Germany) |       |             | Swiss HBM4EU study (Switzerland) |       |         | DIET-HBM (Iceland) |       |         | ESTEBAN (France) |        |         | Combined data* |        |         |
|----------------------------------------------------|---------------------------------------------------------------------|-------------------|-------|-------------|----------------------------------|-------|---------|--------------------|-------|---------|------------------|--------|---------|----------------|--------|---------|
|                                                    |                                                                     | N                 | Beta  | p value     | N                                | Beta  | p value | N                  | Beta  | p value | N                | Beta   | p value | N              | Beta   | p value |
|                                                    | Rarely:<br><1 time /<br>month                                       | 19                | -0.77 | 0.568       | 18                               | 0     |         |                    |       |         | 3                | 20.50  | 0.999   | 40             | 0.37   | 0.750   |
|                                                    | Sometim<br>es: <= 1<br>time /<br>week but<br>>= 1<br>time/mo<br>nth | 89                | -1.49 | 0.246       | 96                               | -0.42 | 0.503   |                    |       |         | 111              | 19.65  | 0.999   | 296            | -0.18  | 0.867   |
|                                                    | Often: 2-<br>3 times /<br>week                                      | 90                | -1.39 | 0.276       | 107                              | -0.62 | 0.335   |                    |       |         | 42               | 19.17  | 0.999   | 239            | -0.17  | 0.879   |
|                                                    | Very<br>Often: 4-<br>6 times /<br>week                              | 34                | -1.4  | 0.29        | 46                               | -0.17 | 0.806   |                    |       |         | 4                | 20.10  | 0.999   | 84             | 0.05   | 0.965   |
|                                                    | Everyday<br>: >= 7<br>times /<br>week                               | 14                | 0.97  | 0.486       | 31                               | -2.32 | 0.051   |                    |       |         |                  |        |         | 45             | 0.26   | 0.826   |
| Frequency<br>consumption of<br>fruit/vegetables*** | 0 =<br>Never                                                        |                   |       |             |                                  |       |         |                    |       |         | 2                | 0      |         | 2              | 0      |         |
|                                                    | Rarely:<br><1 time /<br>month                                       |                   |       |             |                                  |       |         |                    |       |         | 3                | -21.32 | 0.999   | 3              | -22.28 | 0.999   |
|                                                    | Sometim<br>es: <= 1<br>time /<br>week but<br>>= 1<br>time/mo<br>nth | 12                | 0     |             |                                  |       |         | 8                  | 0     |         | 9                | -0.76  | 0.650   | 29             | -2.17  | 0.153   |
|                                                    | Often: 2-<br>3 times /<br>week                                      | 29                | 0.06  | 0.949       | 2                                | 0     |         | 41                 | -1.35 | 0.107   | 36               | -1.67  | 0.281   | 108            | -2.90  | 0.051   |
|                                                    | Very<br>Often: 4-<br>6 times /<br>week                              | 62                | 0.33  | 0.682       | 3                                | -0.09 | 1       | 34                 | -1.58 | 0.070   | 46               | -2.72  | 0.091   | 145            | -3.13  | 0.034   |
|                                                    | Everyday<br>: >= 7<br>times /<br>week                               | 146               | 0.86  | <b>0.27</b> | 292                              | 19.37 | 0.999   | 86                 | -1.05 | 0.185   | 67               | -1.34  | 0.376   | 594            | -2.46  | 0.095   |
| Frequency<br>consumption of cereals                | 0 =<br>Never                                                        |                   |       |             |                                  |       |         | 19                 | 0     |         |                  |        |         | 19             | 0      |         |
|                                                    | Rarely:<br><1 time /<br>month                                       |                   |       |             |                                  |       |         | 8                  | -0.45 | 0.640   |                  |        |         | 8              | -0.63  | 0.520   |

| Determinant                          |                                                 | UBA ESB (Germany) |      |         | Swiss HBM4EU study (Switzerland) |        |         | DIET-HBM (Iceland) |       |              | ESTEBAN (France) |        |         | Combined data* |       |              |
|--------------------------------------|-------------------------------------------------|-------------------|------|---------|----------------------------------|--------|---------|--------------------|-------|--------------|------------------|--------|---------|----------------|-------|--------------|
|                                      |                                                 | N                 | Beta | p value | N                                | Beta   | p value | N                  | Beta  | p value      | N                | Beta   | p value | N              | Beta  | p value      |
|                                      | Sometimes: <= 1 time / week but >= 1 time/month |                   |      |         |                                  |        |         | 25                 | -0.34 | 0.620        |                  |        |         | 25             | -0.38 | 0.590        |
|                                      | Often: 2-3 times / week                         |                   |      |         |                                  |        |         | 53                 | -0.35 | 0.563        |                  |        |         | 53             | -0.47 | 0.449        |
|                                      | Very Often: 4-6 times / week                    |                   |      |         |                                  |        |         | 36                 | -0.65 | 0.333        |                  |        |         | 36             | -0.75 | 0.281        |
|                                      | Everyday : >= 7 times / week                    |                   |      |         |                                  |        |         | 29                 | -0.41 | 0.549        |                  |        |         | 29             | -0.51 | 0.457        |
| Frequency consumption of local food  | 0 = Never                                       |                   |      |         |                                  |        |         |                    |       |              |                  |        |         |                |       |              |
|                                      | Rarely: <1 time / month                         |                   |      |         |                                  |        |         |                    |       |              |                  |        |         |                |       |              |
|                                      | Sometimes: <= 1 time / week but >= 1 time/month |                   |      |         |                                  |        |         |                    |       |              |                  |        |         |                |       |              |
|                                      | Often: 2-3 times / week                         |                   |      |         |                                  |        |         |                    |       |              |                  |        |         |                |       |              |
|                                      | Very Often: 4-6 times / week                    |                   |      |         |                                  |        |         |                    |       |              |                  |        |         |                |       |              |
|                                      | Everyday : >= 7 times / week                    |                   |      |         |                                  |        |         |                    |       |              |                  |        |         |                |       |              |
| Vegetarian                           | No                                              | 239               | 0    |         |                                  |        |         | 167                | 0     |              | 129              | 0      |         | 535            | 0     |              |
|                                      | Yes                                             | 10                | 0.77 | 0.291   |                                  |        |         | 5                  | 1.58  | <b>0.121</b> | 1                | -19.70 | 1       | 16             | 0.855 | <b>0.122</b> |
| Type of drinking water most consumed | Bottled water                                   |                   |      |         | 34                               | 0      |         |                    |       |              | 43               | 0      |         | 77             | 0     |              |
|                                      | Tap water                                       |                   |      |         | 256                              | -0.62  | 0.166   |                    |       |              | 101              | -0.59  | 0.216   | 357            | -0.74 | <b>0.025</b> |
|                                      | Ground water                                    |                   |      |         | 5                                | -20.56 | 0.999   |                    |       |              | 7                | 0.39   | 0.674   | 12             | -1.31 | 0.238        |

| Determinant                                                                |                                                 | UBA ESB (Germany) |       |         | Swiss HBM4EU study (Switzerland) |        |         | DIET-HBM (Iceland) |        |         | ESTEBAN (France)  |       |         | Combined data*    |        |         |
|----------------------------------------------------------------------------|-------------------------------------------------|-------------------|-------|---------|----------------------------------|--------|---------|--------------------|--------|---------|-------------------|-------|---------|-------------------|--------|---------|
|                                                                            |                                                 | N                 | Beta  | p value | N                                | Beta   | p value | N                  | Beta   | p value | N                 | Beta  | p value | N                 | Beta   | p value |
|                                                                            | Other                                           |                   |       |         | 3                                | 0.49   | 0.710   |                    |        |         | 15                | 0.30  | 0.665   | 18                | 0.31   | 0.962   |
| Tap water source at home                                                   | Public                                          |                   |       |         | 256                              | 0      |         |                    |        |         |                   |       |         | 256               | 0      |         |
|                                                                            | Private well                                    |                   |       |         | 5                                | -20.01 | 0.999   |                    |        |         |                   |       |         | 5                 | -19.93 | 0.999   |
|                                                                            | Both public and private well                    |                   |       |         |                                  |        |         |                    |        |         |                   |       |         |                   |        |         |
| Frequency of consumption of coffee****                                     | 0 = Never                                       | 43                | 0     |         |                                  |        |         | 43                 | 0      |         |                   |       |         | 86                | 0      |         |
|                                                                            | Rarely: <1 time / month                         | 16                | -0.91 | 0.211   |                                  |        |         | 2                  | -21.62 | 0.999   |                   |       |         | 18                | -1.08  | 0.093   |
|                                                                            | Sometimes: <= 1 time / week but >= 1 time/month | 23                | -0.69 | 0.269   |                                  |        |         |                    |        |         |                   |       |         | 23                | -0.80  | 0.169   |
|                                                                            | Often: 2-3 times / week                         | 28                | -0.62 | 0.282   |                                  |        |         | 15                 | -1.06  | 0.167   |                   |       |         | 43                | -0.82  | 0.067   |
|                                                                            | Very Often: 4-6 times / week                    | 29                | -0.47 | 0.403   |                                  |        |         | 11                 | 0.15   | 0.840   |                   |       |         | 40                | -0.32  | 0.468   |
|                                                                            | Everyday : >= 7 times / week                    | 110               | -0.6  | 0.148   |                                  |        |         | 101                | -0.78  | 0.061   |                   |       |         | 211               | -0.73  | 0.012   |
| Facilities nearby home at time of sampling: farmland, orchard, or vineyard | No                                              |                   |       |         |                                  |        |         |                    |        |         | 1 filled in       | 0     |         | 1 filled in       | 0      |         |
|                                                                            | Yes                                             |                   |       |         |                                  |        |         |                    |        |         | 15 filled in      | 19.02 | 1       | 15 filled in      | 19.83  | 1       |
| Subject pregnant or occupationally exposed                                 | Pregnant women                                  |                   |       |         |                                  |        |         |                    |        |         |                   |       |         |                   |        |         |
|                                                                            | Occupationally exposed                          |                   |       |         |                                  |        |         |                    |        |         |                   |       |         |                   |        |         |
|                                                                            | Not pregnant or occupationally exposed          | All same category |       |         | All same category                |        |         | All same category  |        |         | All same category |       |         | All same category |        |         |

| Determinant                       |                                                  | UBA ESB (Germany) |      |         | Swiss HBM4EU study (Switzerland) |       |              | DIET-HBM (Iceland)    |      |         | ESTEBAN (France) |       |         | Combined data* |       |              |
|-----------------------------------|--------------------------------------------------|-------------------|------|---------|----------------------------------|-------|--------------|-----------------------|------|---------|------------------|-------|---------|----------------|-------|--------------|
|                                   |                                                  | N                 | Beta | p value | N                                | Beta  | p value      | N                     | Beta | p value | N                | Beta  | p value | N              | Beta  | p value      |
| Labour status at time of sampling | Not employed/ Not actively working at the moment | All same category |      |         | 58                               | 0     |              |                       |      |         | 31               | 0     |         | 338            | 0     |              |
|                                   | Employed                                         |                   |      |         | 239                              | -0.93 | <b>0.007</b> | 41 filled in employed |      |         | 137              | 0.05  | 0.927   | 417            | -0.73 | <b>0.013</b> |
| Income by household*****          | Low                                              |                   |      |         | 61                               | 0     |              |                       |      |         | 23               | 0     |         | 84             | 0     |              |
|                                   | Medium                                           |                   |      |         | 159                              | -0.56 | 0.144        |                       |      |         | 77               | -0.23 | 0.692   | 236            | -0.42 | 0.203        |
|                                   | High                                             |                   |      |         | 54                               | -0.64 | 0.194        |                       |      |         | 64               | -0.66 | 0.293   | 118            | -0.60 | <b>0.140</b> |
|                                   | Don't know or don't want to share                |                   |      |         |                                  |       |              |                       |      |         | 4                | 0.29  | 0.820   | 4              | 0.98  | 0.426        |
| Highest education household       | ISCED 0-2                                        |                   |      |         | 3                                | 0     |              | 11                    | 0    |         | 3                | 0     |         | 17             | 0     |              |
|                                   | ISCED 3-4                                        |                   |      |         | 69                               | -2.09 | 0.117        | 58                    | 0.57 | 0.541   | 45               | 19.78 | 0.999   | 172            | 0.22  | 0.740        |
|                                   | ISCED≥5                                          | All same category |      |         | 223                              | -2.72 | <b>0.039</b> | 123                   | 1.01 | 0.269   | 120              | 19.70 | 0.999   | 715            | 0.20  | 0.759        |

NUTS: Nomenclature of territorial units for statistics

p values mentioned are pairwise p values except for age which was not categorical but continuous

Covariates forced into the model were creatinine, BMI, matrix (morning , spot urine, 24h urine); for combined studies also country was forced into the model.

OR= exp (Beta)

\*: LOQ set at 0.1 µg/L

\*\*: frequency of egg consumption was not significant for the UBA ESB study after recombination of categories

\*\*\*: there was no significant trend in Gly concentrations for frequency of fruit&vegetable consumption for the combined studies after recombination of categories

\*\*\*\*: there was no significant difference in Gly concentrations for frequency of coffee consumption for the combined studies between never drinking coffee and drinking coffee very often

\*\*\*\*\*: Country specific

Note that if a trend was observed in the data and the distribution of participants was unequal over different categories or the number of participants was small for certain categories, a combination of categories was performed. Here results are displayed as observed in the original harmonized questionnaire. Not all studied exposure determinants are listed in the table above; most relevant were chosen.

**Table S2.** Logistic regression for urinary concentrations of AMPA by some potential exposure determinants, subgroups of the participants stratified for individual characteristics, dietary preferences, exposure relevant behavior and sociodemographic information.

| Determinant                     |                                              | UBA ESB (Germany) |       |              | DIET-HBM (Iceland) |       |              | ESTEBAN (France) |       |              | Combined data* |       |         |
|---------------------------------|----------------------------------------------|-------------------|-------|--------------|--------------------|-------|--------------|------------------|-------|--------------|----------------|-------|---------|
|                                 |                                              | N                 | Beta  | p value      | N                  | Beta  | p value      | N                | Beta  | p value      | N              | Beta  | p value |
| Sex                             | Female                                       | 125               | 0     |              | 107                |       |              | 95               | 0     |              | 327            | 0     |         |
|                                 | Male                                         | 124               | 0.44  | <b>0.162</b> | 88                 | -0.03 | 0.934        | 74               | -0.06 | 0.889        | 286            | 0.121 | 0.540   |
| Age in years                    |                                              | 249               | -0.01 | 0.931        | 195                | 0.03  | 0.321        | 168              | 0.06  | 0.880        | 613            | 0.01  | 0.747   |
| Nuts 1                          |                                              | All same category |       |              | All same category  |       |              | 168              |       | 0.854        | 613            |       | <0.001  |
| Nuts 2                          |                                              | All same category |       |              | All same category  |       |              | 168              |       | 0.998        | 613            |       | <0.001  |
| Nuts 3                          |                                              | All same category |       |              | 195                |       | 0.420        | 168              |       | 1            | 613            |       | 0.354   |
| DEGURBA                         | Densely populated area (cities)              | All same category |       |              | 146                | 0     |              | 76               | 0     |              | 471            | 0     |         |
|                                 | Intermediate density area (towns or suburbs) |                   |       |              | 22                 | -0.29 | 0.652        | 47               | 0.09  | 0.838        | 69             | 0.18  | 0.591   |
|                                 | Thinly populated area (rural area)           |                   |       |              | 23                 | -0.58 | 0.380        | 46               | 0.73  | 0.156        | 69             | -0.10 | 0.771   |
| Sampling season                 | Spring                                       | All same category |       |              |                    |       |              | 37               | 0     |              | 286            | 0     |         |
|                                 | Summer                                       |                   |       |              | 65                 | 0     |              | 37               | -0.72 | 0.224        | 102            | -0.53 | 0.253   |
|                                 | Fall                                         |                   |       |              | 104                | -0.22 | 0.611        | 62               | 0.07  | 0.884        | 166            | -0.10 | 0.809   |
|                                 | Winter                                       |                   |       |              | 26                 | 0.83  | <b>0.135</b> | 33               | 0.09  | 0.879        | 59             | -0.04 | 0.928   |
| Use of pesticide outdoor        | No                                           |                   |       |              |                    |       |              | 63               | 0     |              | 63             | 0     |         |
|                                 | Yes                                          |                   |       |              |                    |       |              | 25               | 0.535 | 0.431        | 25             | 0.512 | 0.402   |
| Use of pesticides in the house  | No                                           |                   |       |              |                    |       |              | 68               | 0     |              | 68             | 0     |         |
|                                 | Yes                                          |                   |       |              |                    |       |              | 99               | 0.581 | <b>0.160</b> | 99             | 0.031 | 0.933   |
| Frequency consumption of eggs** | 0 = Never                                    | 3                 | 0     |              |                    |       |              | 3                | 0     |              | 6              | 0     |         |
|                                 | Rarely: <1 time / month                      | 19                | 19.49 | 0.999        |                    |       |              | 3                | -0.84 | 0.672        | 22             | 0.81  | 0.525   |

| Determinant                               |                                                 | UBA ESB (Germany) |       |         | DIET-HBM (Iceland) |       |         | ESTEBAN (France) |        |         | Combined data* |        |         |
|-------------------------------------------|-------------------------------------------------|-------------------|-------|---------|--------------------|-------|---------|------------------|--------|---------|----------------|--------|---------|
|                                           |                                                 | N                 | Beta  | p value | N                  | Beta  | p value | N                | Beta   | p value | N              | Beta   | p value |
|                                           | Sometimes: <= 1 time / week but >= 1 time/month | 89                | 19.46 | 0.999   |                    |       |         | 113              | -0.10  | 0.939   | 202            | 0.75   | 0.525   |
|                                           | Often: 2-3 times / week                         | 90                | 19.55 | 0.999   |                    |       |         | 41               | 0.26   | 0.843   | 131            | 0.75   | 0.525   |
|                                           | Very Often: 4-6 times / week                    | 34                | 19.64 | 0.999   |                    |       |         | 4                | -1.69  | 0.370   | 38             | 0.85   | 0.489   |
|                                           | Everyday : >= 7 times / week                    | 14                | 21.13 | 0.999   |                    |       |         |                  |        |         | 14             | 2.36   | 0.072   |
| Frequency consumption of fruit/vegetables | 0 = Never                                       |                   |       |         |                    |       |         | 2                | 0      |         | 2              | 0      |         |
|                                           | Rarely: <1 time / month                         |                   |       |         |                    |       |         | 3                | -0.72  | 1       | 3              | -21.27 | 0.999   |
|                                           | Sometimes: <= 1 time / week but >= 1 time/month | 12                | 0     |         | 8                  | 0     |         | 11               | -19.34 | 0.999   | 31             | -20.99 | 0.999   |
|                                           | Often: 2-3 times / week                         | 29                | -0.18 | 0.829   | 41                 | -1.42 | 0.115   | 35               | -20.66 | 0.999   | 105            | -21.70 | 0.999   |
|                                           | Very Often: 4-6 times / week                    | 62                | -0.59 | 0.448   | 34                 | -0.97 | 0.277   | 45               | -20.29 | 0.999   | 141            | -22.01 | 0.999   |
|                                           | Everyday : >= 7 times / week                    | 146               | -0.01 | 0.992   | 86                 | -0.92 | 0.262   | 68               | -20.58 | 0.999   | 300            | -21.53 | 0.999   |
| Frequency consumption of cereals          | 0 = Never                                       |                   |       |         | 19                 | 0     |         |                  |        |         | 19             | 0      |         |
|                                           | Rarely: <1 time / month                         |                   |       |         | 8                  | -0.70 | 0.561   |                  |        |         | 8              | -0.70  | 0.561   |
|                                           | Sometimes: <= 1 time / week but >= 1 time/month |                   |       |         | 25                 | -0.27 | 0.718   |                  |        |         | 25             | -0.27  | 0.718   |



| Determinant                                                               |                                                  | UBA ESB (Germany) |       |             | DIET-HBM (Iceland) |       |         | ESTEBAN (France)  |       |         | Combined data*    |        |         |
|---------------------------------------------------------------------------|--------------------------------------------------|-------------------|-------|-------------|--------------------|-------|---------|-------------------|-------|---------|-------------------|--------|---------|
|                                                                           |                                                  | N                 | Beta  | p value     | N                  | Beta  | p value | N                 | Beta  | p value | N                 | Beta   | p value |
|                                                                           | Both public and private well                     |                   |       |             |                    |       |         |                   |       |         |                   |        |         |
| Frequency of consumption of coffee                                        | 0 = Never                                        | 43                | 0     |             | 43                 | 0     |         |                   |       |         | 86                | 0      |         |
|                                                                           | Rarely: <1 time / month                          | 16                | -1.14 | <b>0.15</b> | 2                  | 0.67  | 0.652   |                   |       |         | 18                | -0.78  | 0.231   |
|                                                                           | Sometimes: <= 1 time / week but >= 1 time/month  | 23                | -0.73 | 0.275       |                    |       |         |                   |       |         | 23                | -0.80  | 0.198   |
|                                                                           | Often: 2-3 times / week                          | 28                | 0.03  | 0.963       | 15                 | 0.35  | 0.633   |                   |       |         | 43                | 0.11   | 0.789   |
|                                                                           | Very Often: 4-6 times / week                     | 29                | -0.43 | 0.462       | 44                 | 0.65  | 0.439   |                   |       |         | 40                | -0.18  | 0.699   |
|                                                                           | Everyday : >= 7 times / week                     | 110               | 0.37  | 0.373       | 101                | -0.14 | 0.762   |                   |       |         | 211               | 0.17   | 0.580   |
| Facilities nearby home at time of sampling: farmland, orchard, or vinyard | No                                               |                   |       |             |                    |       |         | 1 filled in       | 0     |         | 1 filled in       | 0      |         |
|                                                                           | Yes                                              |                   |       |             |                    |       |         | 15 filled in      | 22.75 | 1       | 15 filled in      | -20.54 | 1       |
| Subject pregnant or occupationally exposed                                | Pregnant women                                   |                   |       |             |                    |       |         |                   |       |         |                   |        |         |
|                                                                           | Occupationally exposed                           |                   |       |             |                    |       |         |                   |       |         |                   |        |         |
|                                                                           | Not pregnant or occupationally exposed           | All same category |       |             | All same category  |       |         | All same category |       |         | All same category |        |         |
| Labour status at time of sampling                                         | Not employed/ Not actively working at the moment | All same category |       |             |                    |       |         | 30                | 0     |         | 279               | 0      |         |

| Determinant                 |                                   | UBA ESB (Germany) |      |         | DIET-HBM (Iceland)    |      |         | ESTEBAN (France) |        |              | Combined data* |        |         |
|-----------------------------|-----------------------------------|-------------------|------|---------|-----------------------|------|---------|------------------|--------|--------------|----------------|--------|---------|
|                             |                                   | N                 | Beta | p value | N                     | Beta | p value | N                | Beta   | p value      | N              | Beta   | p value |
|                             | Employed                          |                   |      |         | 41 filled in employed |      |         | 139              | -0.91  | <b>0.134</b> | 180            | -0.05  | 0.909   |
| Income by household**       | Low                               |                   |      |         |                       |      |         | 23               | 0      |              | 23             | 0      |         |
|                             | Medium                            |                   |      |         |                       |      |         | 75               | -0.16  | 0.789        | 75             | -0.43  | 0.428   |
|                             | High                              |                   |      |         |                       |      |         | 67               | 0.65   | 0.299        | 67             | -0.47  | 0.396   |
|                             | Don't know or don't want to share |                   |      |         |                       |      |         | 4                | -1.08  | 0.407        | 4              | -20.56 | 0.999   |
| Highest education household | ISCED 0-2                         |                   |      |         | 11                    | 0    |         | 3                | 0      |              | 14             | 0      |         |
|                             | ISCED 3-4                         |                   |      |         | 58                    | 0.63 | 0.534   | 46               | -17.98 | 0.999        | 104            | 1.04   | 0.242   |
|                             | ISCED ≥5                          | All same category |      |         | 123                   | 0.62 | 0.531   | 120              | -18.71 | 0.999        | 492            | 1.29   | 0.138   |

NUTS: Nomenclature of territorial units for statistics

p values mentioned are pairwise p values except for age which was not categorical but continuous

Covariates forced into the model were creatinine, bmi, matrix (morning , spot urine, 24h urine); for combined studies also country was forced into the model.

OR= exp (Beta)

\*: LOQ set at 0.1 µg/L

\*\*: Country specific

Note that if a trend was observed in the data and the distribution of participants was unequal over different categories or the number of participants was small for certain categories, a combination of categories was performed. Here results are displayed as observed in the original harmonized questionnaire. Not all studied exposure determinants are listed in the table above; most relevant were chosen.
